# Supplementary material
Source: PubMed Central journal article supplement (PMC5831326)
Supplement: NIHMS944572-supplement-Sup_Figure.pdf [file NIHMS944572-supplement-Sup_Figure.pdf]

## Upload [help](#)

 Browse Supplementary file 2 - test data.txt

File format: SAINT

Process

## Select columns for analysis [help](#)

Bait column: Bait

Prey column: PreyGene

Abundance column: AvgSpec

Score column: BFDR

Hide advanced

Submit

## Parameters [help](#)

### Primary filter:

0.01 • Score cutoff for prey inclusion

### Secondary filter:

0.05 • Specify middle score boundary for edge colour coding

### Minimum abundance value:

0 • Abundance cutoff for prey inclusion

### Maximum abundance value:

50 • Abundance cap for visualization

### Control subtraction:

yes

### Control column:

ctrlCounts

### Normalization:

no

### Log transform:

no

### Color scale:

blue-black

## Clustering [help](#)

### Clustering to perform:

hierarchical • Options: hierarchical, biclustering, none

### Distance metric:

Canberra (default) • Options: binary, Canberra, Euclidean, Manhattan, maximum and Minkowski

### Clustering type:

Ward's (default) • Options: average, centroid, complete, McQuitty, median, single and Ward's

## Output [help](#)

### Output folder name:

RESULTS • Name for output folder

**Supplementary Figure 1** | Snapshot of the available parameters for the dot plot analytical tool. Default options are shown; alternative options can be selected through dropdown menus or values can be typed in. SAINT and CRAPome analytical pipeline outputs are explicitly supported (columns are pre-recognized). When inputting another format, the user will be prompted to specify the score directionality. Parameters and clustering options are defined in the text and in the user manuals (available in **Supplementary Note 1**).
